# Supplementary material
Source: Springer Nature journal article supplement (https://www.springermedizin.de/resource/supplementary/12889_2012_4819_MOESM1_ESM.pdf/9490726)

# Total prevalence of trachoma

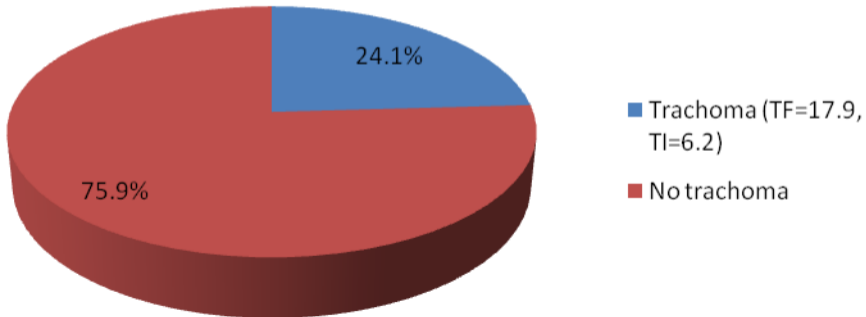

Supplement: MOESM1 [file 9490726]
